# Supplementary material
Source: PubMed Central journal article supplement (PMC5394976)
Supplement: 2016_156000-Disclosures_and_Contributions.pdf [file 2016_156000-Disclosures_and_Contributions.pdf]

Haematologica  
HAEMATOL/2016/156000  
Version 3

Tailoring of medical treatment: hemostasis and thrombosis towards  
precision medicine

Giovanni Di Minno and Elena Tremoli

Disclosures: nothing to report

Contributions: both Authors designed and drafted the perspective article.
